# Supplementary material for: Alcelaphine herpesvirus 1 genes A7 and A8 regulate viral spread and are essential for malignant catarrhal fever
Source: PubMed Central journal article supplement (PMC7098659; doi:10.1371/journal.ppat.1008405), 2020-03-16
Supplement: ppat.1008405.s007.pdf [file ppat.1008405.s007.pdf]

**Table S1. AIHV-1 strain WC11 genome organization compared to other macaviruses**

| WC11 | C500 | AIHV-2     | OvHV-2       | BoHV-6                                    | % ID of AIHV1 proteins | AIHV1 protein name                       | Coding sequence comment | Description                                                                                                                                             |
|------|------|------------|--------------|-------------------------------------------|------------------------|------------------------------------------|-------------------------|---------------------------------------------------------------------------------------------------------------------------------------------------------|
|      | A1   |            |              | Bov1.b1<br>Bov1.b2<br>Bov1.b3             |                        | protein A1                               |                         |                                                                                                                                                         |
| A2   | A2   | A2<br>A2.5 | Ov2<br>Ov2.5 | Bov2<br><br>Bov2.b1<br>Bov2.b2<br>Bov2.b3 | 99                     | protein A2                               |                         | bZIP domain                                                                                                                                             |
| A3   | A3   | A3         | Ov3          |                                           | 100                    | semaphorin A3                            | Semaphorin family       | signal peptide; possibly involved in intracellular signalling                                                                                           |
| A4   | A4   | A4         | Ov3.5        |                                           | 100                    | protein A4                               |                         | signal peptide                                                                                                                                          |
| 3    | 3    | 3          | 3            | 3                                         | 99.6                   | protein G3                               | FGARAT family           |                                                                                                                                                         |
| A4.5 | A4.5 | A4.5       | Ov4.5        | Bov4.5                                    | 100                    | apoptosis regulator BALF1                | Bcl-2 family            | involved in apoptosis                                                                                                                                   |
| 6    | 6    | 6          | 6            | 6                                         | 99.9                   | single-stranded DNA-binding protein      |                         | Zn-finger; involved in DNA replication; possibly involved in gene regulation                                                                            |
| 7    | 7    | 7          | 7            | 7                                         | 99.7                   | DNA packaging terminase subunit 2        |                         | involved in DNA encapsidation                                                                                                                           |
| 8    | 8    | 8          | 8            | 8                                         | 99.9                   | envelope glycoprotein B                  |                         | type 1 membrane protein; possible membrane fusogen; binds cell surface heparan sulphate; involved in cell entry; involved in cell-to-cell spread        |
| 9    | 9    | 9          | 9            | 9                                         | 99.8                   | DNA polymerase catalytic subunit         |                         | involved in DNA replication                                                                                                                             |
| A5   | A5   | A5         | Ov5          | Bov5                                      | 99.3                   | membrane protein BILF1                   | GPCR family             | type 3 membrane protein; involved in intracellular signalling                                                                                           |
| 10   | 10   | 10         | 10           | 10                                        | 99.5                   | protein G10                              | DURP family             |                                                                                                                                                         |
| 11   | 11   | 11         | 11           | 11                                        | 99.8                   | virion protein G11                       | DURP family             |                                                                                                                                                         |
| 17.5 | 17.5 | 17.5       | 17.5         | 17.5                                      | 99.3                   | capsid scaffold protein                  |                         | clipped near C terminus; involved in capsid morphogenesis                                                                                               |
| 17   | 17   | 17         | 17           | 17                                        | 99.2                   | capsid maturation protease               |                         | serine protease (N-terminal region); minor scaffold protein (remainder of protein, clipped near C terminus); involved in capsid morphogenesis           |
| 18   | 18   | 18         | 18           | 18                                        | 99.3                   | protein UL79                             |                         | promotes accumulation of late transcripts                                                                                                               |
| 19   | 19   | 19         | 19           | 19                                        | 99.6                   | DNA packaging tegument protein UL25      |                         | located on capsid near vertices; possibly stabilizes the capsid and retains the genome; involved in DNA encapsidation                                   |
| 20   | 20   | 20         | 20           | 20                                        | 100                    | nuclear protein UL24                     |                         |                                                                                                                                                         |
| 21   | 21   | 21         | 21           | 21                                        | 100                    | thymidine kinase                         |                         | involved in nucleotide metabolism                                                                                                                       |
| 22   | 22   | 22         | 22           | 22                                        | 99.7                   | envelope glycoprotein H                  |                         | type 1 membrane protein; possible membrane fusogen; complexed with envelope glycoprotein L; involved in cell entry; involved in cell-to-cell spread     |
| 23   | 23   | 23         | 23           | 23                                        | 99                     | tegument protein UL88                    |                         |                                                                                                                                                         |
| 24   | 24   | 24         | 24           | 24                                        | 99.7                   | protein UL87                             |                         | promotes accumulation of late transcripts                                                                                                               |
| 25   | 25   | 25         | 25           | 25                                        | 99.9                   | major capsid protein                     |                         | 6 copies form hexons, 5 copies form pentons; involved in capsid morphogenesis                                                                           |
| 26   | 26   | 26         | 26           | 26                                        | 100                    | capsid triplex subunit 2                 |                         | complexed 2:1 with capsid triplex subunit 1 to connect capsid hexons and pentons; involved in capsid morphogenesis                                      |
| 27   | 27   | 27         | 27           | 27                                        | 99.3                   | envelope glycoprotein 48                 |                         | type 2 membrane protein involved in cell-to-cell spread                                                                                                 |
| 28   |      |            |              | 28                                        |                        |                                          |                         |                                                                                                                                                         |
| 29   | 29   | 29         | 29           | 29                                        | 99.9                   | DNA packaging terminase subunit 1        |                         | contains ATPase domain; involved in DNA encapsidation                                                                                                   |
| 30   | 30   | 30         | 30           | 30                                        | 100                    | protein UL91                             |                         |                                                                                                                                                         |
| 31   | 31   | 31         | 31           | 31                                        | 100                    | protein UL92                             |                         |                                                                                                                                                         |
| 32   | 32   | 32         | 32           | 32                                        | 100                    | DNA packaging tegument protein UL17      |                         | capsid-associated; involved in DNA encapsidation; involved in capsid transport                                                                          |
| 33   | 33   | 33         | 33           | 33                                        | 100                    | tegument protein UL16                    |                         | possibly involved in virion morphogenesis                                                                                                               |
| 34   | 34   | 34         | 34           | 34                                        | 99.7                   | protein UL95                             |                         | promotes accumulation of late transcripts                                                                                                               |
| 35   | 35   | 35         | 35           | 35                                        | 100                    | tegument protein UL14                    |                         | involved in virion morphogenesis                                                                                                                        |
| 36   | 36   | 36         | 36           | 36                                        | 99.8                   | tegument serine/threonine protein kinase |                         | involved in protein phosphorylation                                                                                                                     |
| 37   | 37   | 37         | 37           | 37                                        | 100                    | deoxyribonuclease                        |                         | involved in DNA processing                                                                                                                              |
| 38   | 38   | 38         | 38           | 38                                        | 100                    | myristylated tegument protein            |                         | envelope-associated; involved in virion morphogenesis                                                                                                   |
| 39   | 39   | 39         | 39           | 39                                        | 100                    | envelope glycoprotein M                  |                         | type 3 membrane protein; 8 transmembrane domains; complexed with envelope glycoprotein N; involved in virion morphogenesis; involved in membrane fusion |
| 40   | 40   | 40         | 40           | 40                                        | 99.5                   | helicase-primase subunit                 |                         | involved in DNA replication                                                                                                                             |
| 42   | 42   | 42         | 42           | 42                                        | 100                    | tegument protein UL7                     |                         | involved in virion morphogenesis                                                                                                                        |
| 43   | 43   | 43         | 43           | 43                                        | 99.8                   | capsid portal protein                    |                         | dodecamer located at one capsid vertex in place of penton; involved in DNA encapsidation                                                                |

|             |             |             |                |             |      |                                      |               |                                                                                                                                                                                                                                             |
|-------------|-------------|-------------|----------------|-------------|------|--------------------------------------|---------------|---------------------------------------------------------------------------------------------------------------------------------------------------------------------------------------------------------------------------------------------|
| 44          | 44          | 44          | 44             | 44          | 100  | helicase-primase helicase subunit    |               | involved in DNA replication                                                                                                                                                                                                                 |
| 45          | 45          | 45          | 45             | 45          | 100  | tegument protein G45                 |               |                                                                                                                                                                                                                                             |
| 46          | 46          | 46          | 46             | 46          | 100  | uracil-DNA glycosylase               |               | involved in DNA repair                                                                                                                                                                                                                      |
| 47          | 47          | 47          | 47             | 47          | 100  | envelope glycoprotein L              |               | contains signal peptide; complexed with envelope glycoprotein H; involved in cell entry; involved in cell-to-cell spread                                                                                                                    |
| 48          | 48          | 48          | 48             | 48          | 99.6 | tegument protein G48                 |               |                                                                                                                                                                                                                                             |
| 50          | 50          | 50          | 50             | 50          | 99.7 | protein Rta                          |               | involved in gene regulation                                                                                                                                                                                                                 |
|             |             |             | 49             | 49          |      |                                      |               |                                                                                                                                                                                                                                             |
| <b>A6</b>   | <b>A6</b>   | <b>A6</b>   | <b>Ov6</b>     | <b>Bov6</b> |      | protein Zta                          |               | ZEBRA, Zta, Z; bZIP protein; involved in gene regulation                                                                                                                                                                                    |
|             | <b>A7</b>   | <b>A7</b>   | <b>Ov7</b>     | <b>Bov7</b> |      | envelope glycoprotein 42             |               | complexed with envelope glycoprotein H and envelope glycoprotein L; involved in cell entry                                                                                                                                                  |
|             | <b>A8</b>   | <b>A8</b>   | <b>Ov8</b>     | <b>Bov8</b> |      | envelope glycoprotein 350            |               | type 1 membrane protein; involved in cell attachment                                                                                                                                                                                        |
| 52          | 52          | 52          | 52             | 52          | 100  | virion protein G52                   |               |                                                                                                                                                                                                                                             |
| 53          | 53          | 53          | 53             | 53          | 100  | envelope glycoprotein N              |               | type 1 membrane protein; complexed with envelope glycoprotein M; involved in virion morphogenesis; involved in membrane fusion                                                                                                              |
| 54          | 54          | 54          | 54             | 54          | 100  | deoxyuridine triphosphatase          | DURP family   | involved in nucleotide metabolism                                                                                                                                                                                                           |
| 55          | 55          | 55          | 55             | 55          | 100  | tegument protein UL51                |               | involved in virion morphogenesis                                                                                                                                                                                                            |
| 56          | 56          | 56          | 56             | 56          | 100  | helicase-primase primase subunit     |               | involved in DNA replication                                                                                                                                                                                                                 |
| 57          | 57          | 57          | 57             | 57          | 100  | multifunctional expression regulator |               | RNA-binding protein; shuttles between nucleus and cytoplasm; inhibits pre-mRNA splicing; exports virus mRNA from nucleus; exerts most effects post-transcriptionally; involved in gene regulation; involved in RNA metabolism and transport |
| 58          | 58          | 58          | 58             | 58          | 99.7 | envelope protein UL43                |               | type 3 membrane protein; possibly involved in membrane fusion                                                                                                                                                                               |
| 59          | 59          | 59          | 59             | 59          | 100  | DNA polymerase processivity subunit  |               | dsDNA-binding protein; involved in DNA replication                                                                                                                                                                                          |
| 60          | 60          | 60          | 60             | 60          | 100  | ribonucleotide reductase subunit 2   |               | involved in nucleotide metabolism                                                                                                                                                                                                           |
| 61          | 61          | 61          | 61             | 61          | 100  | ribonucleotide reductase subunit 1   |               | involved in nucleotide metabolism                                                                                                                                                                                                           |
| 62          | 62          | 62          | 62             | 62          | 100  | capsid triplex subunit 1             |               | complexed 1:2 with capsid triplex subunit 2 to connect capsid hexons and pentons; involved in capsid morphogenesis                                                                                                                          |
| 63          | 63          | 63          | 63             | 63          | 99.7 | tegument protein UL37                |               | complexed with large tegument protein; involved in virion morphogenesis                                                                                                                                                                     |
| 64          | 64          | 64          | 64             | 64          | 100  | large tegument protein               |               | complexed with tegument protein UL37; ubiquitin-specific protease (N-terminal region); involved in capsid transport                                                                                                                         |
| 65          | 65          | 65          | 65             | 65          | 100  | small capsid protein                 |               | located externally on capsid hexons; involved in capsid morphogenesis; possibly involved in capsid transport                                                                                                                                |
| 66          | 66          | 66          | 66             | 66          | 99.8 | protein UL49                         |               |                                                                                                                                                                                                                                             |
| 67          | 67          | 67          | 67             | 67          | 100  | nuclear egress membrane protein      |               | type 2 membrane protein; interacts with nuclear egress lamina protein; involved in nuclear egress                                                                                                                                           |
| 67A         | 67A         | 67A         | 67A            | 67A         | 100  | DNA packaging protein UL33           |               | interacts with DNA packaging terminase subunit 2; involved in DNA encapsidation                                                                                                                                                             |
| 68          | —68         | 68          | 68             | 68          | 100  | DNA packaging protein UL32           |               | involved in DNA encapsidation; possibly involved in capsid transport                                                                                                                                                                        |
| 69          | 69          | 69          | 69             | 69          | 100  | nuclear egress lamina protein        |               | interacts with nuclear egress membrane protein; involved in nuclear egress                                                                                                                                                                  |
| 73          | 73          | 73          | 73             | 73          | 91.3 | nuclear antigen LANA-1               |               | chromosome-tethering protein; involved in latency                                                                                                                                                                                           |
| 75          | 75          | 75          | 75             | 75          | 99.5 | tegument protein G75                 | FGARAT family |                                                                                                                                                                                                                                             |
| <b>A9</b>   | <b>A9</b>   | <b>A9</b>   | <b>Ov9</b>     | <b>Bov9</b> | 100  | apoptosis regulator A9               | Bcl-2 family  | involved in apoptosis                                                                                                                                                                                                                       |
| <b>A9.5</b> | <b>A9.5</b> | <b>A9.5</b> | <b>Ov9.5</b>   |             | 82.4 | glycoprotein A9.5                    |               | secreted protein                                                                                                                                                                                                                            |
| <b>A10</b>  | <b>A10</b>  | <b>A10</b>  | <b>Ov10</b>    |             | 92.8 | membrane protein A10                 |               |                                                                                                                                                                                                                                             |
|             |             |             | <b>Bov9.b1</b> |             |      |                                      |               |                                                                                                                                                                                                                                             |
|             |             |             | <b>Bov9.b2</b> |             |      |                                      |               |                                                                                                                                                                                                                                             |
