# Supplementary material for: Alcelaphine herpesvirus 1 genes A7 and A8 regulate viral spread and are essential for malignant catarrhal fever
Source: PubMed Central journal article supplement (PMC7098659; doi:10.1371/journal.ppat.1008405), 2020-03-16
Supplement: ppat.1008405.s008.pdf [file ppat.1008405.s008.pdf]

**Table S2. Whole AIHV-1 genome sequencing data**

| <b>Description</b>                                          | <b>Total reads (no.)</b> | <b>Target reads (no.)</b> | <b>Target reads (%)</b> | <b>Coverage (reads/nt)</b> |
|-------------------------------------------------------------|--------------------------|---------------------------|-------------------------|----------------------------|
| A7 <sup>STOP-39</sup> (BAC plasmid)                         | 1,352,076                | 1,333,326                 | 99                      | 1,366                      |
| A7 <sup>STOP-207</sup> (BAC plasmid)                        | 1,336,896                | 1,322,936                 | 99                      | 1,355                      |
| A8 <sup>STOP-159</sup> (BAC plasmid)                        | 1,516,540                | 1,482,871                 | 98                      | 1,519                      |
| A7 <sup>STOP-207</sup> (BAC <sup>-</sup> virus in BT cells) | 1,460,388                | 251,143                   | 17                      | 275                        |
| A8 <sup>STOP-159</sup> (BAC <sup>-</sup> virus in BT cells) | 1,520,344                | 165,427                   | 11                      | 181                        |
