# Supplementary material for: Alcelaphine herpesvirus 1 genes A7 and A8 regulate viral spread and are essential for malignant catarrhal fever
Source: PubMed Central journal article supplement (PMC7098659; doi:10.1371/journal.ppat.1008405), 2020-03-16
Supplement: ppat.1008405.s009.pdf [file ppat.1008405.s009.pdf]

**Table S3.** Oligonucleotides.

| Sequence      | Primer            | Primer sequence (5' – 3')                                                                                             |
|---------------|-------------------|-----------------------------------------------------------------------------------------------------------------------|
| galk sequence | A7-NS-galkFwd39   | CTGGGCTCTGAGATGTTGGCAGAAATGTTGTGGCCTGC<br>AGTGAACATGCTGCCTGTTGACAATTAATCATCGGCA                                       |
|               | A7-NS-galkRev39   | GTGGCTGCCAAAATAAAAAAATGTCTACCAAAGTGCT<br>TTACGGGGAATCAGCACTGTCCTGCTCCTT                                               |
| galk sequence | A7-NS-galkFwd207  | GGCAACCTAACCTTTCCCACCAGAGCGGGGATGAGG<br>TTATTAGGGCCCCCTGTTGACAATTAATCATCGGCA                                          |
|               | A7-NS-galkRev207  | GTCTGAACCCAGGGTTAAAATCCCACTGTCATTGACT<br>GGGGGTATGTATCAGCACTGTCCTGCTCCTT                                              |
| galk sequence | A8-NS-galkFwd     | CCAAACTGTGAAAACCTGTATCTATGACATAACCTTCAAC<br>AGCACCTCTCCTGTTGACAATTAATCATCGGCA                                         |
|               | A8-NS-galkRev     | GGCTCCGAGGGTGGCATTAGCTATATGGAAATAATTGT<br>TGCTGATATTCATCAGCACTGTCCTGCTCCTT                                            |
| A7            | A7-NS-oligoFwd39  | CTGGGCTCTGAGATGTTGGCAGAAATGTTGTGGCCTGC<br>AGTGAACATGCTGAATTCCCCGTAAAGCACTTTTGGTAG<br>ACATTTTTTTTTATTTTGGCAGCCAC       |
|               | A7-NS-oligoRev39  | GTGGCTGCCAAAATAAAAAAATGTCTACCAAAGTGCT<br>TTACGGGGAATTCAGCATGTTCACTGCAGGCCACAACA<br>TTTCTGCCAACATCTCAGAGCCCAG          |
| A7            | A7-NS-oligoFwd207 | GGCAACCTAACCTTTCCCACCAGAGCGGGGATGAGG<br>TTATTAGGGCCTAGAATTCTACATACCCCCAGTCAATGA<br>CAGTGTGGATTTTAACCCTGGGTTTCAGAC     |
|               | A7-NS-oligoRev207 | GTCTGAACCCAGGGTTAAAATCCCACTGTCATTGACT<br>GGGGGTATGTAGAATTCTAGGCCCTAATAACCTCATCC<br>CCGCTCTGGTGGGGAAAGGTTAGGTTGCC      |
| A8            | A8-NS-oligoFwd    | CCAAACTGTGAAAACCTGTATCTATGACATAACCTTCAAC<br>AGCACCTCTTAGAAATTCGTGAATATCAGCAACAATTATT<br>TCCATATAGCTAATGCCACCCTCGGAGCC |
|               | A8-NS-oligoRev    | GGCTCCGAGGGTGGCATTAGCTATATGGAAATAATTGT<br>TGCTGATATTCACGAATTCTAAGAGGTGCTGTTGAAGGT<br>TATGTCATAGATACAGTTTTTCACAGTTTGG  |
| A7            | A7-165F           | CTAACCTTTCCCACCAGAGC                                                                                                  |
|               | A7-303R           | CTCGCACTGGGACCAAGAGTC                                                                                                 |
|               | A7-476F           | CACACCTTACGAGACCAGG                                                                                                   |
|               | A7-deltastopR     | TCCATGGACGGGTGCTG                                                                                                     |
| A8            | A8-ATGF           | ATGGATAACTATACACTAGC                                                                                                  |
|               | A8-278R           | CAGGCGTATGTA CTGCGAGC                                                                                                 |
|               | A8-1661F          | CACTGTATCAGTGGATACTAC                                                                                                 |
|               | A8-deltastopR     | TTCTGTCATACGTAGAGCTA                                                                                                  |
